# Supplementary material
Source: Research Square preprint supplement (doi:10.21203/rs.3.rs-8840236/v1)
Supplement: Supplementary file 1 [file 52c70345ccf62721f1dc14e1.docx]

**Supplementary Table**. Descriptive statistics and bivariate analysis comparing participants who were included and those who were excluded due to missing follow-up information.

| **Variable** | **Excluded**  **(N = 216)** | **Included**  **(N = 528)** | ***test*** | ***p. value*** |
| --- | --- | --- | --- | --- |
| Quality of life *M* (SD) | 36.30 (5.55) | 36.10 (5.60) | t=0.40 | .344 |
| Subjective age *M* (SD) | 0.21 (0.19) | 0.20 (0.17) | t=0.67 | .250 |
| Ageism total *M* (SD) | 2.02 (3.47) | 2.80 (4.06) | t=-2.21 | .014 |
| Age *M* (SD) | 78.74 (7.86) | 77.85 (8.55) | t=1.32 | .094 |
| Sex % |  |  |  |  |
| Female | 29.3% | 70.7% | χ2=0.04 | .869 |
| Male | 28.6% | 71.4% |
| Ethnicity |  |  |  |  |
| Jews | 28.5% | 71.5% | χ2=3.25 | .196 |
| Arabs | 39.6% | 60.4% |
| FSU immigrants | 26.3% | 73.7% |
| Education level - *M* (SD) | 2.85 (1.72) | 3.27 (1.60) | t=-2.56 | .005 |
| Chronic diseases *M* (SD) | 2.00 (1.82) | 1.79 (1.66) | t=1.53 | .064 |
| IADL limitations *M* (SD) | 0.89 (2.00) | 0.72 (1.67) | t=1.24 | .108 |
| Self-rated health *M* (SD) | 2.68 (1.15) | 2.91 (1.10) | t=-2.57 | .005 |
